# Supplementary material for: Del1 Is a Growth Factor for Skeletal Progenitor Cells in the Fracture Callus
Source: MDPI journal article supplement (doi:10.3390/biom13081214), 2023-08-03
Supplement: s1 [file s1]

**Supplement Figure S2. Exogeneous Del1 protein elution from hydrogel.**

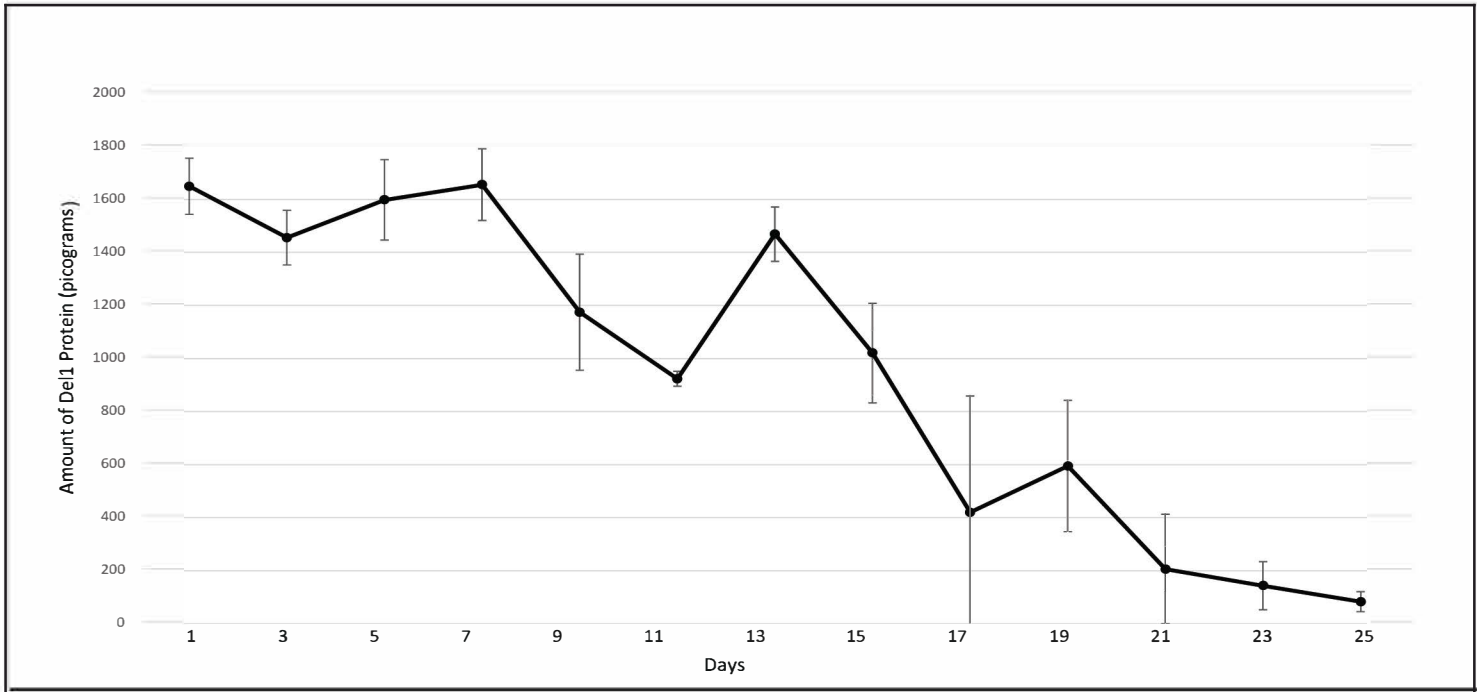

**Exogeneous Del1 elution from hydrogel.** Hydrogel with Del1 was placed in standard petri dish and the amount of Del1 elution was measured. The results showed consistent release of Del1 from hydrogel for 28 days. (n=3)
