# Supplementary material for: Del1 Is a Growth Factor for Skeletal Progenitor Cells in the Fracture Callus
Source: MDPI journal article supplement (doi:10.3390/biom13081214), 2023-08-03
Supplement: s1 [file s1]

**Supplement Figure S1. Immunohistochemical staining for non-skeletal lineages.**

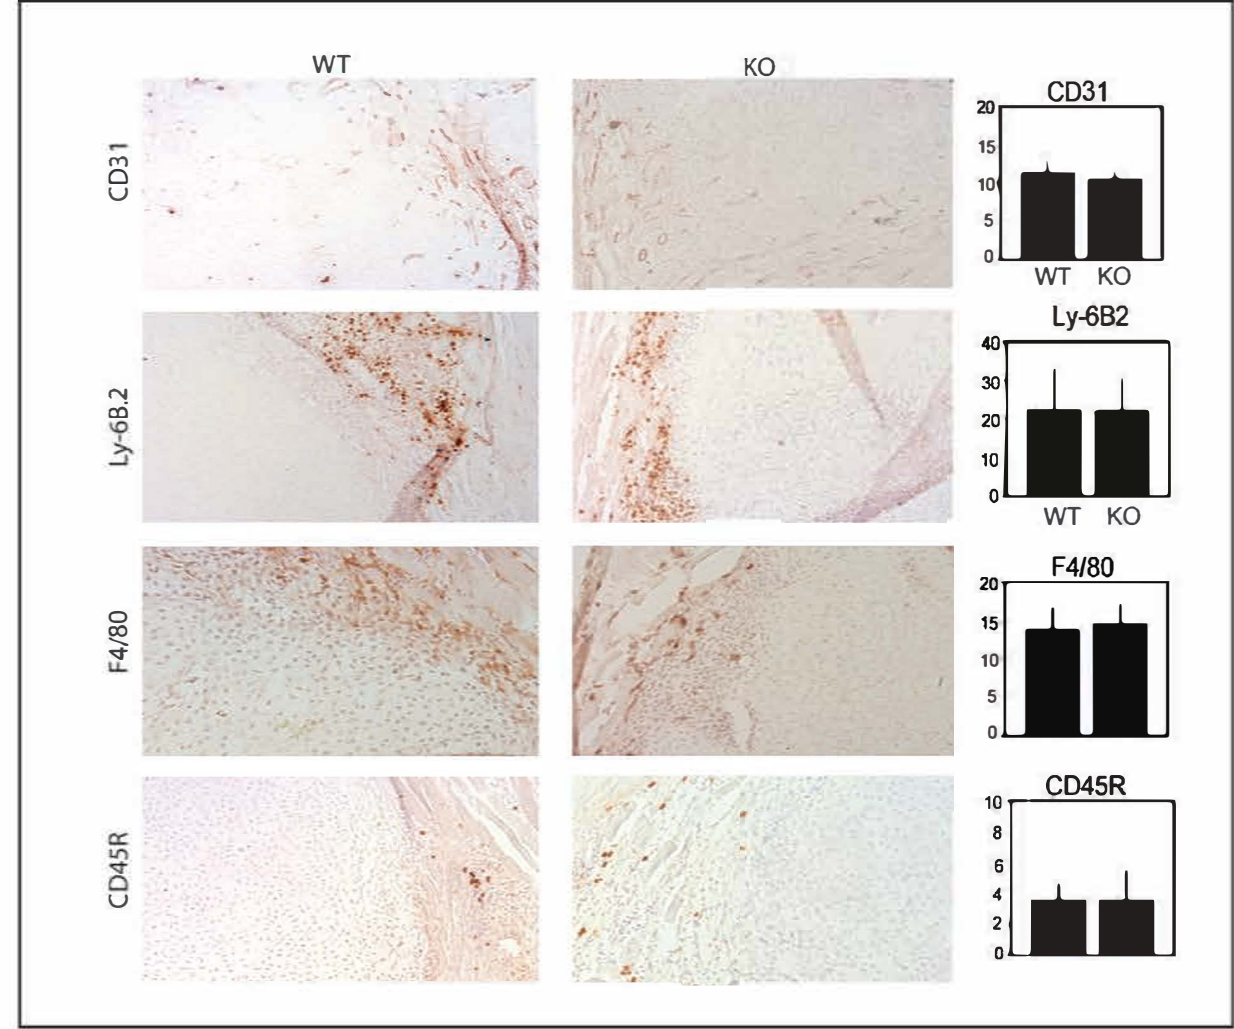

**Immunohistochemical staining for non-skeletal lineages.** Histology analysis of the bone fracture callus for endothelial cells (CD31) macrophage (F4/80), neutrophil and monocytes (Ly-6B.2), and T cell and B cells (CD45).
